# Supplementary material for: Multi-ethnic Investigation of Risk and Immune Determinants of COVID-19 Outcomes
Source: PubMed Central journal article supplement (PMC8963691; doi:10.21203/rs.3.rs-1055587/v1), 2022-03-22
Supplement: 9f078faf991a9002b51c80d0.pdf [file 9f078faf991a9002b51c80d0.pdf]

*Supplemental Table 5: Univariable logistic regression using standardized laboratory values to predict in-hospital mortality, stratified by race/ethnicity.*

| <b>Test</b>          | <b>White OR<br/>(95% CI)</b> | <b>Black OR<br/>(95% CI)</b> | <b>Hispanic OR<br/>(95% CI)</b> | <b>All patients OR<br/>(95% CI)</b> |
|----------------------|------------------------------|------------------------------|---------------------------------|-------------------------------------|
| <b>WBC</b>           | 1.62 (1.17-2.24)             | 1.53 (1.04-2.25)             | 1.32 (0.994-1.75)               | 1.48 (1.22-1.79)                    |
| <b>Albumin</b>       | 0.589 (0.408-<br>0.85)       | 0.587 (0.425-<br>0.81)       | 0.673 (0.513-<br>0.883)         | 0.624 (0.522-<br>0.747)             |
| <b>D-dimer</b>       | 1.37 (0.971-1.94)            | 1.17 (0.854-<br>1.59)        | 1.79 (1.17-2.74)                | 1.33 (1.1-1.62)                     |
| <b>Ferritin</b>      | 1.36 (0.821-2.24)            | 1.1 (0.858-1.4)              | 1.18 (0.916-1.51)               | 1.15 (0.977-1.35)                   |
| <b>Procalcitonin</b> | 1.01 (0.644-1.59)            | 1.37 (1.01-1.85)             | 2.71 (0.965-7.63)               | 1.31 (1.07-1.61)                    |
| <b>LDH</b>           | 1.72 (0.951-3.12)            | 1.3 (0.97-1.73)              | 1.45 (1.04-2.01)                | 1.38 (1.13-1.7)                     |
| <b>CRP</b>           | 1.65 (1.18-2.3)              | 1.31 (0.995-<br>1.72)        | 1.66 (1.24-2.22)                | 1.52 (1.28-1.81)                    |
| <b>IL-1B</b>         | 0.879 (0.515-1.5)            | 2.06 (1.09-3.87)             | 0.411 (0.121-1.4)               | 1.01 (0.774-1.32)                   |
| <b>IL-6</b>          | 2.55 (1.36-4.76)             | 1.39 (1.03-1.87)             | 1.48 (1-2.18)                   | 1.57 (1.23-2)                       |
| <b>IL-8</b>          | 12.9 (1.72-97.9)             | 7.69 (1.62-36.2)             | 2.18 (0.792-6.01)               | 4.31 (1.76-10.5)                    |
| <b>TNF-alpha</b>     | 0.999 (0.741-<br>1.35)       | 1.25 (0.893-<br>1.75)        | 0.987 (0.314-3.1)               | 1.09 (0.918-1.3)                    |
