# Supplementary material for: Multi-ethnic Investigation of Risk and Immune Determinants of COVID-19 Outcomes
Source: PubMed Central journal article supplement (PMC8963691; doi:10.21203/rs.3.rs-1055587/v1), 2022-03-22
Supplement: 46d243e7381de7ff88594886.pdf [file 46d243e7381de7ff88594886.pdf]

*Supplemental Table 6: Interaction p-values from multivariable logistic regression including interaction terms between race/ethnicity and demographic, clinical, or laboratory factors.*

| <b>Variable</b>          | <b>Black vs. White<br/>Interaction p-value</b> | <b>Hispanic vs. White<br/>Interaction p-value</b> |
|--------------------------|------------------------------------------------|---------------------------------------------------|
| Age (yrs)                | 0.157                                          | 0.153                                             |
| Manhattan facility       | 0.477                                          | 0.176                                             |
| Hypertension             | 0.938                                          | 0.964                                             |
| Diabetes                 | 0.0885                                         | 0.629                                             |
| Coronary artery disease  | 0.597                                          | 0.833                                             |
| Heart failure            | 0.535                                          | 0.853                                             |
| Atrial fibrillation      | 0.786                                          | 0.347                                             |
| Chronic kidney disease   | 0.783                                          | 0.206                                             |
| Obesity                  | 0.1                                            | 0.0647                                            |
| Cancer                   | 0.67                                           | 0.266                                             |
| Oxygen sat. <92%         | 0.831                                          | 0.192                                             |
| <b>Laboratory Values</b> |                                                |                                                   |
| Albumin                  | 0.72                                           | 0.817                                             |
| CRP                      | 0.473                                          | 0.917                                             |
| D-dimer                  | 0.319                                          | 0.707                                             |
| Ferritin                 | 0.324                                          | 0.441                                             |
| IL-1B                    | 0.038                                          | 0.167                                             |
| IL-6                     | 0.158                                          | 0.19                                              |
| IL-8                     | 0.752                                          | 0.0862                                            |
| LDH                      | 0.266                                          | 0.585                                             |
| Procalcitonin            | 0.22                                           | 0.0734                                            |
| TNF-alpha                | 0.573                                          | 0.544                                             |
| WBC                      | 0.954                                          | 0.471                                             |
