# Supplementary material for: Multi-ethnic Investigation of Risk and Immune Determinants of COVID-19 Outcomes
Source: PubMed Central journal article supplement (PMC8963691; doi:10.21203/rs.3.rs-1055587/v1), 2022-03-22
Supplement: b4cc53570222dff430f95874.pdf [file b4cc53570222dff430f95874.pdf]

Supplemental Table 2: Baseline demographic and clinical characteristics of patients presenting to the emergency department but not admitted to the hospital, by race/ethnicity.

|                                       | <b>NH Black<br/>(N=635)</b> | <b>NH White<br/>(N=397)</b> | <b>Hispanic<br/>(N=495)</b> | <b>Asian<br/>(N=86)</b> | <b>Other<br/>(N=262)</b> |
|---------------------------------------|-----------------------------|-----------------------------|-----------------------------|-------------------------|--------------------------|
| <b>Age (yrs)</b>                      | 50 (37 - 61)                | 52 (35 - 64)                | 52 (35 - 63)                | 47.5 (34.25 - 60)       | 49 (36 - 61)             |
| <b>Current smoker</b>                 | 38 (7.5%)                   | 12 (4.3%)                   | 18 (5.2%)                   | 4 (6.2%)                | 5 (2.5%)                 |
| <b>Former smoker</b>                  | 55 (10.9%)                  | 46 (16.4%)                  | 68 (19.7%)                  | 5 (7.8%)                | 29 (14.6%)               |
| <b>Never smoker</b>                   | 412 (81.6%)                 | 223 (79.4%)                 | 259 (75.1%)                 | 55 (85.9%)              | 164 (82.8%)              |
| <b>Hypertension</b>                   | 90 (14.2%)                  | 43 (10.8%)                  | 87 (17.6%)                  | 12 (14%)                | 24 (9.2%)                |
| <b>Diabetes</b>                       | 49 (7.7%)                   | 21 (5.3%)                   | 48 (9.7%)                   | 8 (9.3%)                | 22 (8.4%)                |
| <b>Coronary artery disease</b>        | 19 (3%)                     | 22 (5.5%)                   | 25 (5.1%)                   | 1 (1.2%)                | 11 (4.2%)                |
| <b>Heart failure</b>                  | 10 (1.6%)                   | 7 (1.8%)                    | 15 (3%)                     | 1 (1.2%)                | 3 (1.1%)                 |
| <b>Atrial fibrillation</b>            | 6 (0.9%)                    | 13 (3.3%)                   | 9 (1.8%)                    | NA                      | 8 (3.1%)                 |
| <b>Chronic kidney disease</b>         | 22 (3.5%)                   | 9 (2.3%)                    | 20 (4%)                     | NA                      | 8 (3.1%)                 |
| <b>COPD/asthma</b>                    | 34 (5.4%)                   | 10 (2.5%)                   | 33 (6.7%)                   | NA                      | 8 (3.1%)                 |
| <b>Obesity</b>                        | 37 (5.8%)                   | 5 (1.3%)                    | 37 (7.5%)                   | 2 (2.3%)                | 10 (3.8%)                |
| <b>Cancer</b>                         | 11 (1.7%)                   | 13 (3.3%)                   | 25 (5.1%)                   | 1 (1.2%)                | 9 (3.4%)                 |
| <b>Chronic liver disease</b>          | 8 (1.3%)                    | 6 (1.5%)                    | 7 (1.4%)                    | 1 (1.2%)                | 4 (1.5%)                 |
| <b>Obstructive sleep apnea</b>        | 10 (1.6%)                   | 1 (0.3%)                    | 4 (0.8%)                    | NA                      | 4 (1.5%)                 |
| <b>HIV</b>                            | 5 (0.8%)                    | 2 (0.5%)                    | 12 (2.4%)                   | NA                      | 2 (0.8%)                 |
| <b>Temperature (°F)</b>               | 98.5 (97.8 - 99.6)          | 98.25 (97.7 - 99.1)         | 99 (98.3 - 100.4)           | 98.6 (97.9 - 99.5)      | 98.7 (98 - 100)          |
| <b>Heart rate (bpm)</b>               | 92 (82 - 102)               | 88 (78 - 99)                | 95 (82.5 - 106)             | 94 (81 - 105.75)        | 96 (82.25 - 108)         |
| <b>Systolic blood pressure (mmHg)</b> | 133 (120.5 - 148)           | 130 (118 - 141)             | 130 (119 - 144)             | 129 (118 - 143.5)       | 129.5 (117 - 140.75)     |
| <b>Respiratory rate (bpm)</b>         | 18 (17 - 19)                | 18 (17 - 20)                | 18 (18 - 20)                | 18 (16 - 19)            | 18 (18 - 20)             |
| <b>Oxygen saturation (%)</b>          | 98 (97 - 100)               | 98 (96 - 99)                | 97 (96 - 98)                | 98 (97 - 99)            | 98 (96 - 99)             |
| <b>Oxygen sat. &lt;92%</b>            | 24 (3.8%)                   | 16 (4%)                     | 32 (6.5%)                   | 6 (7.1%)                | 16 (6.1%)                |
