# Supplementary material for: Multi-ethnic Investigation of Risk and Immune Determinants of COVID-19 Outcomes
Source: PubMed Central journal article supplement (PMC8963691; doi:10.21203/rs.3.rs-1055587/v1), 2022-03-22
Supplement: bfde225fc6010c217a73e351.pdf [file bfde225fc6010c217a73e351.pdf]

*Supplemental Table 7: Multivariable logistic regression using standardized laboratory values to predict in-hospital mortality, stratified by race/ethnicity, adjusting for age, sex, and baseline hypoxia.*

| <b>var_label</b>     | <b>White OR<br/>(95% CI)</b> | <b>Black OR<br/>(95% CI)</b> | <b>Hispanic OR<br/>(95% CI)</b> | <b>All patients OR<br/>(95% CI)</b> |
|----------------------|------------------------------|------------------------------|---------------------------------|-------------------------------------|
| <b>Albumin</b>       | 0.698 (0.47-1.04)            | 0.681 (0.479-0.968)          | 0.769 (0.568-1.04)              | 0.745 (0.612-0.906)                 |
| <b>CRP</b>           | 1.613 (1.12-2.33)            | 1.266 (0.954-1.68)           | 1.445 (1.04-2.01)               | 1.392 (1.16-1.68)                   |
| <b>D-dimer</b>       | 1.283 (0.878-1.88)           | 0.911 (0.62-1.34)            | 1.398 (0.892-2.19)              | 1.141 (0.917-1.42)                  |
| <b>Ferritin</b>      | 1.484 (0.886-2.49)           | 1.13 (0.866-1.47)            | 1.204 (0.885-1.64)              | 1.186 (0.991-1.42)                  |
| <b>IL-1B</b>         | 0.782 (0.405-1.51)           | 2.349 (1.13-4.86)            | 0.254 (0.0596-1.07)             | 0.977 (0.741-1.29)                  |
| <b>IL-6</b>          | 2.296 (1.21-4.36)            | 1.302 (0.949-1.79)           | 1.274 (0.837-1.94)              | 1.43 (1.12-1.82)                    |
| <b>IL-8</b>          | 8.758 (0.953-80.7)           | 6.05 (1.19-30.3)             | 1.514 (0.594-3.86)              | 2.858 (1.14-7.17)                   |
| <b>LDH</b>           | 1.808 (0.945-3.46)           | 1.183 (0.866-1.61)           | 1.359 (0.95-1.95)               | 1.344 (1.07-1.68)                   |
| <b>Procalcitonin</b> | 0.981 (0.581-1.66)           | 1.383 (0.999-1.91)           | 2.654 (0.884-7.96)              | 1.27 (1.01-1.59)                    |
| <b>TNF-alpha</b>     | 0.974 (0.66-1.44)            | 1.132 (0.798-1.61)           | 0.71 (0.172-2.93)               | 1.052 (0.863-1.28)                  |
| <b>WBC</b>           | 1.478 (1.06-2.07)            | 1.399 (0.898-2.18)           | 1.172 (0.879-1.56)              | 1.335 (1.08-1.65)                   |
