# Supplementary material for: Multi-ethnic Investigation of Risk and Immune Determinants of COVID-19 Outcomes
Source: PubMed Central journal article supplement (PMC8963691; doi:10.21203/rs.3.rs-1055587/v1), 2022-03-22
Supplement: c8ef79a0531e19f61ae8f9d3.pdf [file c8ef79a0531e19f61ae8f9d3.pdf]

Supplemental Table 1: Baseline demographic and clinical characteristics of patients presenting to the emergency department, by hospitalization status.

|                                       | <b>Admitted<br/>(N=3,086)</b> | <b>Not Admitted<br/>(N=1,911)</b> | <b>P-value</b> |
|---------------------------------------|-------------------------------|-----------------------------------|----------------|
| <b>Age (yrs)</b>                      | 66 (56 - 77)                  | 50 (36 - 62)                      | <0.001         |
| <b>Asian</b>                          | 144 (4.8%)                    | 86 (4.6%)                         | 0.781          |
| <b>Hispanic</b>                       | 892 (29.7%)                   | 495 (26.4%)                       | 0.014          |
| <b>Non-Hispanic Black</b>             | 825 (27.4%)                   | 635 (33.9%)                       | <0.001         |
| <b>Non-Hispanic White</b>             | 689 (22.9%)                   | 397 (21.2%)                       | 0.168          |
| <b>Other</b>                          | 458 (15.2%)                   | 262 (14%)                         | 0.245          |
| <b>Current smoker</b>                 | 113 (4.7%)                    | 78 (5.5%)                         | 0.282          |
| <b>Former smoker</b>                  | 658 (27.4%)                   | 204 (14.4%)                       | <0.001         |
| <b>Never smoker</b>                   | 1629 (67.9%)                  | 1133 (80.1%)                      | <0.001         |
| <b>Hypertension</b>                   | 1096 (35.5%)                  | 258 (13.5%)                       | <0.001         |
| <b>Diabetes</b>                       | 741 (24%)                     | 149 (7.8%)                        | <0.001         |
| <b>Coronary artery disease</b>        | 395 (12.8%)                   | 78 (4.1%)                         | <0.001         |
| <b>Heart failure</b>                  | 218 (7.1%)                    | 36 (1.9%)                         | <0.001         |
| <b>Atrial fibrillation</b>            | 201 (6.5%)                    | 36 (1.9%)                         | <0.001         |
| <b>Chronic kidney disease</b>         | 368 (11.9%)                   | 59 (3.1%)                         | <0.001         |
| <b>COPD/asthma</b>                    | 265 (8.6%)                    | 86 (4.5%)                         | <0.001         |
| <b>Obesity</b>                        | 250 (8.1%)                    | 91 (4.8%)                         | <0.001         |
| <b>Cancer</b>                         | 205 (6.6%)                    | 59 (3.1%)                         | <0.001         |
| <b>Chronic liver disease</b>          | 83 (2.7%)                     | 28 (1.5%)                         | 0.004          |
| <b>Obstructive sleep apnea</b>        | 65 (2.1%)                     | 19 (1%)                           | 0.003          |
| <b>HIV</b>                            | 56 (1.8%)                     | 21 (1.1%)                         | 0.058          |
| <b>Temperature (°F)</b>               | 98.9 (98.2 - 100.2)           | 98.6 (97.9 - 99.7)                | <0.001         |
| <b>Heart rate (bpm)</b>               | 97 (84 - 110)                 | 92 (81 - 104)                     | <0.001         |
| <b>Systolic blood pressure (mmHg)</b> | 129 (115 - 146)               | 131 (119 - 144)                   | 0.02           |
| <b>Respiratory rate (bpm)</b>         | 20 (18 - 22)                  | 18 (17 - 20)                      | <0.001         |
| <b>Oxygen saturation (%)</b>          | 95 (91 - 97)                  | 98 (96 - 99)                      | <0.001         |
| <b>Oxygen sat. &lt;92%</b>            | 775 (25.1%)                   | 96 (5%)                           | <0.001         |
