# Supplementary material for: Multi-ethnic Investigation of Risk and Immune Determinants of COVID-19 Outcomes
Source: PubMed Central journal article supplement (PMC8963691; doi:10.21203/rs.3.rs-1055587/v1), 2022-03-22
Supplement: d41279579edabf660bc7389d.pdf [file d41279579edabf660bc7389d.pdf]

*Supplemental Table 4: Univariable logistic regression using demographic and clinical factors to predict in-hospital mortality, stratified by race/ethnicity.*

| <b>Variable</b>                 | <b>White OR<br/>(95% CI)</b> | <b>Black OR<br/>(95% CI)</b> | <b>Hispanic OR<br/>(95% CI)</b> | <b>All patients OR<br/>(95% CI)</b> |
|---------------------------------|------------------------------|------------------------------|---------------------------------|-------------------------------------|
| <b>Age (yrs)</b>                | 1.07 (1.05-1.08)             | 1.05 (1.04-1.07)             | 1.05 (1.04-1.06)                | 1.06 (1.05-1.06)                    |
| <b>Age 55-64</b>                | 1.66 (0.715-3.85)            | 2.51 (1.27-4.99)             | 2.77 (1.65-4.66)                | 2.38 (1.65-3.43)                    |
| <b>Age 65-74</b>                | 3.56 (1.75-7.19)             | 5 (2.61-9.62)                | 4.22 (2.58-6.97)                | 4.22 (3.03-5.94)                    |
| <b>Age &gt;=75</b>              | 10.3 (5.33-20)               | 7.92 (4.16-15.1)             | 6.05 (3.75-9.69)                | 8.17 (5.91-11.2)                    |
| <b>Race: Non-Hispanic Black</b> | NA                           | NA                           | NA                              | 0.733 (0.589-0.913)                 |
| <b>Race: Hispanic</b>           | NA                           | NA                           | NA                              | 0.606 (0.486-0.755)                 |
| <b>Manhattan facility</b>       | 0.378 (0.274-0.523)          | 0.517 (0.379-0.705)          | 0.593 (0.431-0.816)             | 0.477 (0.397-0.571)                 |
| <b>Current or former smoker</b> | 1.01 (0.702-1.46)            | 0.933 (0.662-1.31)           | 1.46 (1.03-2.06)                | 1.11 (0.907-1.36)                   |
| <b>Hypertension</b>             | 1.39 (0.998-1.94)            | 1.1 (0.807-1.5)              | 1.6 (1.17-2.2)                  | 1.32 (1.1-1.58)                     |
| <b>Diabetes</b>                 | 1.2 (0.795-1.8)              | 1.57 (1.13-2.19)             | 1.51 (1.08-2.1)                 | 1.37 (1.12-1.67)                    |
| <b>Coronary artery disease</b>  | 1.6 (1.07-2.4)               | 1.79 (1.16-2.77)             | 1.65 (1.05-2.58)                | 1.73 (1.36-2.22)                    |
| <b>Heart failure</b>            | 1.85 (1.08-3.16)             | 1.39 (0.826-2.33)            | 1.52 (0.864-2.69)               | 1.59 (1.17-2.17)                    |
| <b>Atrial fibrillation</b>      | 1.86 (1.18-2.95)             | 1.94 (1.02-3.68)             | 3.06 (1.62-5.83)                | 2.31 (1.68-3.18)                    |
| <b>Chronic kidney disease</b>   | 2.32 (1.33-4.04)             | 1.75 (1.19-2.59)             | 1.45 (0.944-2.23)               | 1.65 (1.28-2.12)                    |
| <b>COPD/asthma</b>              | 1.13 (0.652-1.96)            | 0.634 (0.352-1.14)           | 0.925 (0.541-1.58)              | 0.87 (0.634-1.2)                    |
| <b>Obesity</b>                  | 0.523 (0.262-1.04)           | 0.817 (0.47-1.42)            | 1.32 (0.793-2.2)                | 0.861 (0.62-1.2)                    |
| <b>Cancer</b>                   | 1.02 (0.566-1.86)            | 1.15 (0.656-2.02)            | 1.95 (1.11-3.43)                | 1.33 (0.959-1.85)                   |
| <b>Respiratory rate</b>         | 1.03 (1.01-1.06)             | 1.1 (1.07-1.14)              | 1.1 (1.07-1.13)                 | 1.08 (1.06-1.09)                    |
| <b>Oxygen sat. &lt;92%</b>      | 2.09 (1.48-2.96)             | 2.72 (1.89-3.94)             | 2.71 (1.96-3.74)                | 2.43 (2-2.95)                       |
