# Supplementary material for: Multi-ethnic Investigation of Risk and Immune Determinants of COVID-19 Outcomes
Source: PubMed Central journal article supplement (PMC8963691; doi:10.21203/rs.3.rs-1055587/v1), 2022-03-22
Supplement: f4d767c2ab48a0d9b5b31ef7.pdf [file f4d767c2ab48a0d9b5b31ef7.pdf]

Supplemental Table 8: Median cytokine levels of patients from the University of Pennsylvania cohort.

| Cytokine     | Healthy Donor (HD, N=10) | Recovered Donor (RD, N=12) | HD+RD (N=22) | NH Black (NHB, N=8) | Asian (AS, N=4) | NH White (NHW, N=3) | P-value (NHB vs. HD+RD) | P-value (NHW vs. HD+RD) | P-value (AS vs. HD+RD) |
|--------------|--------------------------|----------------------------|--------------|---------------------|-----------------|---------------------|-------------------------|-------------------------|------------------------|
| IL1beta      | 2.20                     | 3.88                       | 2.66         | 4.13                | 4.44            | 3.8                 | 0.115                   | 0.138                   | 0.090                  |
| IL6          | 2.25                     | 2.59                       | 2.53         | 37.1                | 54.6            | 211                 | <b>0.003</b>            | 0.157                   | 0.094                  |
| TNFa         | 14.2                     | 12.6                       | 13.7         | 9.47                | 7.37            | 9.15                | 0.165                   | 0.086                   | 0.231                  |
| IP10         | 77.2                     | 55.6                       | 61.5         | 227                 | 266             | 509                 | <b>0.006</b>            | <b>0.041</b>            | <b>0.025</b>           |
| IFNlambda1   | 82.5                     | 82.1                       | 82.1         | 71.1                | 90.7            | 49.0                | 0.659                   | 0.863                   | 0.514                  |
| IL8          | 8.25                     | 6.74                       | 7.60         | 18.5                | 12.8            | 36.2                | 0.659                   | 0.157                   | 0.094                  |
| IL12p70      | 3.14                     | 3.42                       | 3.20         | 1.98                | 1.78            | 4.57                | <b>0.004</b>            | 0.707                   | 0.513                  |
| IFNa2        | 2.72                     | 4.82                       | 3.49         | 5.06                | 4.92            | 3.90                | 0.638                   | 0.707                   | 0.497                  |
| IFNlambda2.3 | 12.2                     | 15.2                       | 13.7         | 12.3                | 12.0            | 12.9                | 0.693                   | 0.598                   | 0.693                  |
| GMCSF        | 11.7                     | 7.15                       | 8.32         | 6.57                | 7.92            | 8.44                | 0.296                   | 0.598                   | 0.693                  |
| IFNbeta      | 4.25                     | 4.25                       | 4.25         | 7.07                | 5.39            | 4.25                | 0.650                   | 0.985                   | 0.260                  |
| IL10         | 12.3                     | 9.34                       | 10.5         | 15.5                | 18.8            | 18.3                | 0.189                   | 0.117                   | 0.069                  |
| IFNg         | 5.97                     | 7.91                       | 6.04         | 7.32                | 8.71            | 7.36                | 0.296                   | 0.328                   | 0.231                  |
